# Supplementary material
Source: MDPI journal article supplement (https://www.mdpi.com/2077-0472/14/2/183)
Supplement: s1 [file s1]

**Table S1.** Discrete element model parameters for entire-plant rice.

| Parameter                                                   | Value                  | Data Sources |
|-------------------------------------------------------------|------------------------|--------------|
| Density of main stem/ (kg·m <sup>-3</sup> )                 | 196                    |              |
| Elastic modulus of main stem/ (Pa)                          | 3.20×10 <sup>8</sup>   |              |
| Poisson's ratio of main stem                                | 0.40                   | [1]          |
| Coefficient of static friction (main stem - main stem)      | 0.44                   |              |
| Coefficient of static friction (main stem - steel)          | 0.363                  |              |
| Coefficient of static friction (main stem - sub stem)       | 0.56                   | [2]          |
| Coefficient of rolling friction (main stem - main stem)     | 0.07                   |              |
| Coefficient of rolling friction (main stem - steel)         | 0.208                  | [1]          |
| Coefficient of rolling friction (main stem - sub stem)      | 0.032                  | [2]          |
| Collision restitution coefficient (main stem - main stem)   | 0.230                  |              |
| Collision restitution coefficient (main stem - steel)       | 0.357                  | [1]          |
| Collision restitution coefficient (main stem - sub stem)    | 0.440-                 | [2]          |
| Normal stiffness coefficient of main stem/ (N/m)            | 1.516×10 <sup>12</sup> |              |
| Tangential stiffness coefficient of main stem/ (N/m)        | 1.516×10 <sup>12</sup> |              |
| Critical normal stress of main stem/(Pa)                    | 1.275 10 <sup>11</sup> | [3]          |
| Critical tangential stress of main stem/(Pa)                | 1.275 10 <sup>11</sup> |              |
| Bonding radius of main stem/(mm)                            | 4.4                    |              |
| Density of sub stem/(kg m <sup>3</sup> )                    | 181                    |              |
| Elastic modulus of sub stem/(Pa)                            | 1.50×10 <sup>8</sup>   |              |
| Poisson's ratio of sub stem                                 | 0.4                    |              |
| Coefficient of static friction (sub stem - sub stem)        | 0.75                   |              |
| Coefficient of static friction (sub stem - steel)           | 0.55                   | [2]          |
| Coefficient of rolling friction (sub stem - sub stem)       | 0.046                  |              |
| Coefficient of rolling friction (sub stem - steel)          | 0.0035                 |              |
| Collision restitution coefficient (sub stem - sub stem)     | 0.320                  |              |
| Collision restitution coefficient (sub stem - steel)        | 0.355                  |              |
| Normal stiffness coefficient of sub stem/ (N/m)             | 1.5×10 <sup>10</sup>   |              |
| Tangential stiffness coefficient of sub stem/ (N/m)         | 1.0×10 <sup>10</sup>   |              |
| Critical normal stress of sub stem/(Pa)                     | 5.0×10 <sup>8</sup>    |              |
| Critical tangential stress of sub stem/(Pa)                 | 5.0×10 <sup>8</sup>    | [3]          |
| Bonding radius of sub stem/(mm)                             | 0.7                    |              |
| Bonding radius of rice rachis/(mm)                          | 0.35                   |              |
| Density of rice grain/(kg m <sup>3</sup> )                  | 1150                   | [4]          |
| Elastic modulus of rice grain/(MPa)                         | 3707                   | [2]          |
| Poisson's ratio of rice grain                               | 0.25                   | [5]          |
| Coefficient of static friction (rice grain - rice grain)    | 0.39                   |              |
| Coefficient of static friction (rice grain - steel)         | 0.50                   |              |
| Coefficient of static friction (rice grain - main stem)     | 0.65                   |              |
| Coefficient of static friction (rice grain - sub stem)      | 0.60                   |              |
| Coefficient of rolling friction (rice grain - rice grain)   | 0.015                  | [2]          |
| Coefficient of rolling friction (rice grain - steel)        | 0.010                  |              |
| Coefficient of rolling friction (rice grain - main stem)    | 0.020                  |              |
| Coefficient of rolling friction (rice grain - sub stem)     | 0.020                  |              |
| Collision restitution coefficient (rice grain - rice grain) | 0.42                   |              |
| Collision restitution coefficient (rice grain - steel)      | 0.57                   | [5]          |
| Collision restitution coefficient (rice grain - main stem)  | 0.395                  |              |
| Collision restitution coefficient (rice grain - sub stem)   | 0.420                  | [2]          |

## References

1. Jia, H.; Deng, J.; Deng, Y.; Chen, T.; Wang, G.; Sun, Z.; Guo, H. Contact Parameter Analysis and Calibration in Discrete Element Simulation of Rice Straw. *International Journal of Agricultural and Biological Engineering* **2021**, *14*, 72–81, doi:10.25165/ijabe.v14i4.6435.
2. Xu, C.; Xu, F.; Tang, H.; Wang, J. Determination of Characteristics and Establishment of Discrete Element Model for Whole Rice Plant. *Agronomy* **2023**, *13*, 2098, doi:10.3390/agronomy13082098.
3. Tang, H.; Xu, C.; Zhao, J.; Wang, J. Stripping Mechanism and Loss Characteristics of a Stripping-Prior-to-Cutting Header for Rice Harvesting Based on CFD-DEM Simulations and Bench Experiments. *Biosyst Eng* **2023**, *229*, 116–136, doi:10.1016/j.biosystemseng.2023.03.023.
4. Massah, J.; Khazaei, J. Simultaneous Measurement of Rice Grain Friction Coefficient and Angle of Repose Using Rotating Cylinders. *J Appl Bot Food Qual* **2022**, 60-66 Pages, doi:10.5073/JABFQ.2022.095.008.
5. Wang, J.; Xu, C.; Xu, Y.; Wang, Z.; Qi, X.; Wang, J.; Zhou, W.; Tang, H.; Wang, Q. Influencing Factors Analysis and Simulation Calibration of Restitution Coefficient of Rice Grain. *Applied Sciences* **2021**, *11*, 5884, doi:10.3390/app11135884.
